# Supplementary material
Source: PubMed Central journal article supplement (PMC10018406)
Supplement: jamasurg-e230096-s002.pdf [file jamasurg-e230096-s002.pdf]

## Supplementary Online Content

Etoh T, Ohyama T, Sakuramoto S, et al; the Japanese Laparoscopic Surgery Study Group (JLSSG). Five-year survival outcomes of laparoscopy-assisted vs open distal gastrectomy for advanced gastric cancer: the JLSSG0901 randomized clinical trial. *JAMA Surg*. Published online March 15, 2023. doi:10.1001/jamasurg.2023.0096

**eTable 1.** Inclusion and Exclusion Criteria

**eTable 2.** Surgical Results, Early Postoperative Course, Mortality

**eTable 3.** Comparison of Intraoperative and Postoperative Complications According to CTCAE Version 4.0 Between the 2 Groups Per Protocol Set

**eTable 4.** Late Complications in the Per Protocol Set

**eAppendix.** Institutions That Participated in the Study

This supplementary material has been provided by the authors to give readers additional information about their work.

**eTable 1. Inclusion and Exclusion Criteria**

---

***Inclusion criteria***

- 1) Histologically proven gastric carcinoma
- 2) MP, SS, or SE without involvement of other organs, N0–2, excluding bulky N2, and M0 according to the Japanese classification system
- 3) Tumor located in the body and the antrum of the stomach and the indication for distal gastrectomy
- 4) No invasion to the duodenum
- 5) No invasion to the esophagus
- 6) PS (ECOG) 0 or 1
- 7) Body mass index <30 kg/m<sup>2</sup>
- 8) No history of gastrointestinal surgery
- 9) No history of chemotherapy or radiotherapy
- 10) Sufficient organ functions
- 11) Provided written informed consent
- 12) Aged 20–80 years

***Exclusion criteria***

- 1) Synchronous or metachronous (within 5 years) malignancies other than carcinoma in situ
  - 2) Pregnant or breastfeeding women
  - 3) Severe psychiatric disorders
  - 4) Continuous systemic steroid therapy
  - 5) History of myocardial infarction or unstable angina pectoris within 6 months
  - 6) Uncontrollable hypertension
  - 7) Uncontrollable diabetes mellitus or administration of insulin
  - 8) Severe respiratory disease requiring continuous oxygen therapy
-

**eTable 2.** Surgical Results, Early Postoperative Course, Mortality

|                                             | Full analysis set |               |         | Per protocol set |               |         |
|---------------------------------------------|-------------------|---------------|---------|------------------|---------------|---------|
|                                             | ODG (n=254)       | LADG (n= 248) | p-value | ODG (n=233)      | LADG (n= 227) | p-value |
| <b><i>Surgical results</i></b>              |                   |               |         |                  |               |         |
| Procedures                                  |                   |               | 0.931   |                  |               | 1       |
| Distal gastrectomy                          | 246 (96.9%)       | 239 (96.4%)   |         | 233 (100%)       | 227 (100%)    |         |
| Total gastrectomy                           | 5 (2%)            | 5 (2%)        |         | 0                | 0             |         |
| Others                                      | 3 (1.1%)          | 4 (1.6%)      |         | 0                | 0             |         |
| Lymph node dissection                       |                   |               | 0.786   |                  |               | 1       |
| < D2                                        | 6 (2.4%)          | 7 (2.8%)      |         | 0                | 0             |         |
| D2 and more                                 | 248 (97.6%)       | 241 (97.2%)   |         | 233 (100%)       | 227 (100%)    |         |
| Number of harvested lymph node <sup>†</sup> | 43 (32-54)        | 43 (33-55)    | 0.580   | 43 (33-54)       | 43 (33-55)    | 0.821   |
| Reconstruction                              |                   |               | 0.477   |                  |               | 0.375   |
| Billroth I                                  | 122 (48%)         | 132 (53.2%)   |         | 120 (51.5%)      | 128 (56.4%)   |         |
| Billroth II                                 | 17 (6.7%)         | 18 (7.3%)     |         | 13 (5.6%)        | 17 (7.5%)     |         |
| Roux-enY                                    | 111 (43.7%)       | 91 (36.7%)    |         | 98 (42.1%)       | 79 (34.8%)    |         |
| Others                                      | 4 (1.6%)          | 7 (2.8%)      |         | 2 (0.9%)         | 3 (1.3%)      |         |
| Omentectomy                                 |                   |               | <0.001  |                  |               | <0.001  |
| Total/Partial/None                          | 184/64/3          | 62/182/4      |         | 170/63/0         | 52/175/0      |         |
| Combined resection of other organs          | 10 (3.9%)         | 9 (3.6%)      | 1       | 7 (0.3%)         | 2 (0.9%)      | 0.176   |
| Operative time, min <sup>†</sup>            | 205 (175-240)     | 291 (236-345) | <0.001  | 205 (175-237)    | 291 (243-344) | <0.001  |
| Estimated blood loss, ml <sup>†</sup>       | 141 (80-270)      | 30 (10-90)    | <0.001  | 150 (80-270)     | 30 (10-85)    | <0.001  |
| Blood transfusion                           | 9 (3.5%)          | 2 (0.8%)      | 0.063   | 7 (3%)           | 2 (0.9%)      | 0.176   |
| Length of wound, cm <sup>†</sup>            | 18 (16-20)        | 4 (3-5)       | <0.001  | 18 (16-20)       | 4 (3-5)       | <0.001  |

|                                    | Full analysis set |                  |         | Per protocol set |                  |         |
|------------------------------------|-------------------|------------------|---------|------------------|------------------|---------|
|                                    | ODG (n=254)       | LADG (n= 248)    | p-value | ODG (n=233)      | LADG (n= 227)    | p-value |
| <b>Early postoperative course</b>  |                   |                  |         |                  |                  |         |
| Maximum body temperature, °C†      |                   |                  | 0.557   |                  |                  | 0.383   |
| Within 3 days after surgery        | 37.7 (37.3-38)    | 37.6 (37.3-38.1) |         | 37.7 (37.3-38)   | 37.6 (37.3-38.1) |         |
| Time to first flatus, day†         | 3 (2-3)           | 2 (2-3)          | <0.001  | 3 (2-3)          | 2 (2-3)          | <0.001  |
| Usage of analgesics                | 138 (54.3%)       | 95 (38.3%)       | <0.001  | 125 (53.6%)      | 87 (38.3%)       | 0.001   |
| Length of postoperative stay, day† | 11 (9-14)         | 10 (9-14)        | 0.572   | 10 (9-14)        | 10 (9-13)        | 0.263   |
| Reoperation within 30 days         | 1 (0.4%)          | 3 (1.2%)         | 0.368   | 1 (0.4%)         | 3 (1.3%)         | 0.367   |
| Readmission within 30 days         | 9 (3.6%)          | 2 (0.8%)         | 0.063   | 8 (3.4%)         | 2 (0.9%)         | 0.106   |
| Postoperative chemotherapy         |                   |                  | 0.591   |                  |                  | 0.513   |
| Presence/Absence                   | 112/142           | 116/132          |         | 105/128          | 110/117          |         |
| <b>Mortality</b>                   |                   |                  |         |                  |                  |         |
| Within 30 days                     | 1 (0.4%)          | 1 (0.4%)         | 1       | 1 (0.4%)         | 1 (0.4%)         | 1       |
| In-hospital                        | 1 (0.4%)          | 1 (0.4%)         | 1       | 1 (0.4%)         | 1 (0.4%)         | 1       |

Data are n (%) or median (range)\* or median (IQR)†.

ODG: open distal gastrectomy, LADG: laparoscopy-assisted distal gastrectomy, ECOG: Eastern Cooperative Oncology Group.

**eTable 3.** Comparison of Intraoperative and Postoperative Complications According to CTCAE Version 4.0 Between the 2 Groups Per Protocol Set

|                                      | All grades      |                 |              | Grade ≥3        |               |              |
|--------------------------------------|-----------------|-----------------|--------------|-----------------|---------------|--------------|
|                                      | ODG (n=233)     | LADG (n= 227)   | p-value      | ODG (n=233)     | LADG (n= 227) | p-value      |
| <b>Intraoperative complications</b>  |                 |                 |              |                 |               |              |
| Splenic injury                       | 1 (0.4%)        | 0               | 1            | 1 (0.4%)        | 0             | 1            |
| Arterial injury                      | 2 (0.8%)        | 1 (0.4%)        | 1            | 2 (0.8%)        | 0             | 0.499        |
| Venous injury                        | 3 (1.2%)        | 0               | 0.249        | 0               | 0             | —            |
| Gastrointestinal injury              | 1 (0.4%)        | 1 (0.4%)        | 1            | 0               | 0             | —            |
| Thromboembolic event                 | 0               | 0               | —            | 0               | 0             | —            |
| <b>Total number of complications</b> | <b>6 (2.6%)</b> | <b>2 (0.9%)</b> | <b>0.285</b> | <b>2 (0.9%)</b> | <b>0</b>      | <b>0.499</b> |
| <b>Postoperative complications</b>   |                 |                 |              |                 |               |              |
| Pancreatic fistula                   | 3 (1.3%)        | 9 (4.0%)        | 0.085        | 1 (0.4%)        | 2 (0.9%)      | 0.619        |
| Anastomotic leakage                  | 6 (2.6%)        | 1 (0.4%)        | 0.122        | 6 (2.6%)        | 1 (0.4%)      | 0.122        |
| Anastomotic stenosis                 | 1 (0.4%)        | 2 (0.9%)        | 0.619        | 0               | 0             | —            |

|                                      | All grades        |                   |              | Grade ≥3         |                 |              |
|--------------------------------------|-------------------|-------------------|--------------|------------------|-----------------|--------------|
|                                      | ODG (n=233)       | LADG (n= 227)     | p-value      | ODG (n=233)      | LADG (n= 227)   | p-value      |
| Intra-abdominal abscess              | 4 (1.7%)          | 3 (1.3%)          | 1            | 2 (0.9%)         | 3 (1.3%)        | 0.682        |
| Bleeding                             | 3 (1.3%)          | 0                 | 0.249        | 1 (0.4%)         | 0               | 1            |
| Wound infection                      | 1 (0.4%)          | 1 (0.4%)          | 1            | 0                | 0               | —            |
| Wound dehiscence                     | 1 (0.4%)          | 0                 | 1            | 1 (0.4%)         | 0               | 1            |
| Bowel obstruction                    | 2 (0.9%)          | 3 (1.3%)          | 0.682        | 1 (0.4%)         | 0               | 1            |
| Cholecystitis                        | 4 (1.7%)          | 0                 | 0.124        | 1 (0.4%)         | 0               | 1            |
| Pneumonia                            | 2 (0.9%)          | 6 (2.6%)          | 0.171        | 0                | 1 (0.4%)        | 0.494        |
| Pulmonary infarction                 | 0                 | 1 (0.4%)          | 0.494        | 0                | 0               | —            |
| Ascites                              | 1 (0.4%)          | 3 (1.3%)          | 0.367        | 0                | 0               | —            |
| Catheter infection                   | 0                 | 1 (0.4%)          | 0.494        | 0                | 0               | —            |
| Others                               | 0                 | 2 (0.9%)          | 0.243        | 0                | 1 (0.4%)        | 0.494        |
| <b>Total number of complications</b> | <b>25 (10.7%)</b> | <b>26 (11.5%)</b> | <b>0.882</b> | <b>11 (4.7%)</b> | <b>8 (3.5%)</b> | <b>0.641</b> |

**eTable 4.** Late Complications in the Per Protocol Set

|                      | All grades     |               |             | Grade ≥3       |               |             |
|----------------------|----------------|---------------|-------------|----------------|---------------|-------------|
|                      | ODG<br>(n=233) | LADG (n= 227) | p-<br>value | ODG<br>(n=233) | LADG (n= 227) | p-<br>value |
| Anastomotic stenosis | 1 (0.4%)       | 4 (1.8%)      | 0.211       | 1 (0.4%)       | 2 (0.9%)      | 0.619       |
| Wound infection      | 5 (2.1%)       | 0             | 0.061       | 0              | 0             | 1           |
| Wound dehiscence     | 3 (1.3%)       | 4 (1.8%)      | 0.721       | 2 (0.9%)       | 3 (1.3%)      | 0.682       |
| Bowel obstruction    | 8 (3.4%)       | 5 (2.2%)      | 0.576       | 6 (2.6%)       | 3 (1.3%)      | 0.504       |
| Cholecystitis        | 11 (4.7%)      | 2 (0.9%)      | 0.021       | 5 (2.1%)       | 2 (0.9%)      | 0.450       |
| Pneumonia            | 2 (0.9%)       | 2 (0.9%)      | 1           | 1 (0.4%)       | 1 (0.4%)      | 1           |

## **eAppendix.** Institutions That Participated in the Study

Aichi Cancer Center Hospital

Izumiyotsu Municipal Hospital

Ehime University

Osaka City General Hospital

Osaka University

Tokyo Metropolitan Cancer and Infectious Diseases Center Komagome Hospital

Kyushu University

Gifu University

Kobe University

Saitama Medical University International Medical Center

Fukuoka University

Nihon University Hospital

Tokyo Medical and Dental University

Oita University

Fukui-ken Saiseikai Hospital

Nagano Municipal Hospital

Niigata Municipal Hospital

Hyogo Cancer Center

Ishikawa Prefectural Central Hospital

Iwate Medical University

Osaka Medical and Pharmaceutical University

Osaka Metropolitan University

Okayama University

Kitasato University

Kinki University

Keio University

Saga University

Shizuoka Cancer Center

St. Marianna University School of Medicine

Toyamaken Saiseikai Takaoka Hospital

Nagoya University

Hakodate Goryoukaku Hospital

Yokohama City University Medical Center

Saga-ken Medical Center Koseikan

National Cancer Center East Hospital



Cancer Institute Hospital  
Saitama Cancer Center
