# Supplementary material
Source: PubMed Central journal article supplement (PMC10018406)
Supplement: jamasurg-e230096-s003.pdf [file jamasurg-e230096-s003.pdf]

**\*Group Name(s): Japanese Laparoscopic Surgery Study Group (JLSSG)**

| *First Name and Middle Initial(s) | *Last Name | *Suffix (eg, Jr, III) | Academic Degrees | Institution                                | Location (city, state/province, country) | Role or Contribution, eg, chair, principal investigator | Group (if more than 1 Group listed in the byline and/or Subgroup (eg, Steering Committee)) |
|-----------------------------------|------------|-----------------------|------------------|--------------------------------------------|------------------------------------------|---------------------------------------------------------|--------------------------------------------------------------------------------------------|
| Masahiro                          | Sakon      |                       | M.D.             | Nagano Municipal Hospital                  | Nagano, Japan                            | Patient Recruitment, Enrollment and Retention           |                                                                                            |
| Yasuhiro                          | Kodera     |                       | M.D.             | Nagoya University                          | Aichi, Japan                             | Patient Recruitment, Enrollment and Retention           |                                                                                            |
| Naoshi                            | Kubo       |                       | M.D.             | Osaka City General Hospital                | Osaka, Japan                             | Patient Recruitment, Enrollment and Retention           |                                                                                            |
| Yuko                              | Kitagawa   |                       | M.D.             | Keio University School of Medicine         | Tokyo, Japan                             | Patient Recruitment, Enrollment and Retention           |                                                                                            |
| Ken                               | Hagiwara   |                       | M.D.             | Nihon University Hospital                  | Tokyo, Japan                             | Patient Recruitment, Enrollment and Retention           |                                                                                            |
| Shinya                            | Mikami     |                       | M.D.             | St. Marianna University School of Medicine | Kanagawa, Japan                          | Patient Recruitment, Enrollment and Retention           |                                                                                            |
| Atsushi                           | Yasuda     |                       | M.D.             | Kinki University                           | Osaka, Japan                             | Patient Recruitment, Enrollment and Retention           |                                                                                            |
| Yuji                              | Watanabe   |                       | M.D.             | Ehime University                           | Ehime, Japan                             | Patient Recruitment, Enrollment and Retention           |                                                                                            |
| Masanori                          | Terashima  |                       | M.D.             | Shizuoka Cancer Center                     | Shizuoka, Japan                          | Patient Recruitment, Enrollment and Retention           |                                                                                            |
| Hiroaki                           | Tanaka     |                       | M.D.             | Osaka Metropolitan University              | Osaka, Japan                             | Patient Recruitment, Enrollment and Retention           |                                                                                            |
| Shingo                            | Togano     |                       | M.D.             | Izumiotu Municipal Hospital                | Osaka, Japan                             | Patient Recruitment, Enrollment and Retention           |                                                                                            |
| Toshiyoshi                        | Fujiwara   |                       | M.D.             | Okayama University                         | Okayama, Japan                           | Patient Recruitment, Enrollment and Retention           |                                                                                            |
| Osamu                             | Ikeda      |                       | M.D.             | Saga-ken Medical Center Koseikan           | Saga, Japan                              | Patient Recruitment, Enrollment and Retention           |                                                                                            |
| Hirokazu                          | Noshiro    |                       | M.D.             | Saga University                            | Saga, Japan                              | Patient Recruitment, Enrollment and Retention           |                                                                                            |
| Suguru                            | Hasegawa   |                       | M.D.             | Fukuoka University                         | Fukuoka, Japan                           | Patient Recruitment, Enrollment and Retention           |                                                                                            |
| Kenoki                            | Ohuchida   |                       | M.D.             | Kyushu University                          | Fukuoka, Japan                           | Patient Recruitment, Enrollment and Retention           |                                                                                            |
| Shirou                            | Kuwabara   |                       | M.D.             | Niigata Municipal Hospital                 | Niigata, Japan                           | Patient Recruitment, Enrollment and Retention           |                                                                                            |
| Toru                              | Yoshida    |                       | M.D.             | Toyamaken Saiseikai Takaoka Hospital       | Toyama, Japan                            | Patient Recruitment, Enrollment and Retention           |                                                                                            |
| Susumu                            | Amaya      |                       | M.D.             | Fukui-ken Saiseikai Hospital               | Fukui, Japan                             | Patient Recruitment, Enrollment and Retention           |                                                                                            |
| Yoshihiro                         | Takeji     |                       | M.D.             | Kobe University                            | Hyogo, Japan                             | Patient Recruitment, Enrollment and Retention           |                                                                                            |
| Kazuhisa                          | Ehara      |                       | M.D.             | Saitama Cancer Center                      | Saitama, Japan                           | Patient Recruitment, Enrollment and Retention           |                                                                                            |
| Kazuyuki                          | Kojima     |                       | M.D.             | Dokkyo Medical University                  | Tochigi, Japan                           | Adviser                                                 |                                                                                            |
| Shuji                             | Takiguchi  |                       | M.D.             | Nagoya City University                     | Aichi, Japan                             | Adviser                                                 |                                                                                            |
| Noriyuki                          | Inaki      |                       | M.D.             | Kanazawa University                        | Ishikawa, Japan                          | Adviser                                                 |                                                                                            |
