# Supplementary material
Source: PubMed Central journal article supplement (PMC10018406)
Supplement: jamasurg-e230096-s004.pdf [file jamasurg-e230096-s004.pdf]

## Data Sharing Statement

Etoh. Five-Year Survival Outcomes of Laparoscopy-Assisted vs Open Distal Gastrectomy for Advanced Gastric Cancer. *JAMA Surg.* Published March 15, 2023.

doi:10.1001/jamasurg.2023.0096

### Data

**Data available:** Yes

**Data types:** Deidentified participant data

**How to access data:** How to access data: teto@oita-u.ac.jp

**When available:** With publication

### Supporting Documents

**Document types:** Statistical/analytic code

**How to access documents:** How to access documents: teto@oita-u.ac.jp

**When available:** With publication

### Additional Information

**Who can access the data:** Researchers whose proposed use of the data has been approved

**Types of analyses:** For writing a review paper

**Mechanisms of data availability:** With a signed data access agreement
